# Supplementary material for: Associations of the staffing structure of intensive care units and high care units on in-hospital mortality among patients with sepsis: a cross-sectional study of Japanese nationwide claims data
Source: HighWire-hosted journal article supplement (doi:10.1136/bmjopen-2024-085763), 2024-07-01
Supplement: bmjopen-2024-085763supp001_data_supplement.pdf [file bmjopen-2024-085763supp001_data_supplement.pdf]

**Table S1.** Evaluation criteria for medical and nursing care needs

| A. Monitoring/procedure needs                                                                                                                                              | 0 points | 1 point                                             | 2 points |
|----------------------------------------------------------------------------------------------------------------------------------------------------------------------------|----------|-----------------------------------------------------|----------|
| Electrocardiographic monitoring                                                                                                                                            | No       | Yes                                                 |          |
| Infusion pump management                                                                                                                                                   | No       | Yes                                                 |          |
| Arterial pressure measurement                                                                                                                                              | No       | Yes                                                 |          |
| Syringe pump management                                                                                                                                                    | No       | Yes                                                 |          |
| Central venous pressure measurement                                                                                                                                        | No       | Yes                                                 |          |
| Mechanical ventilation                                                                                                                                                     | No       | Yes                                                 |          |
| Blood transfusion and blood product management                                                                                                                             | No       | Yes                                                 |          |
| Pulmonary arterial pressure measurement                                                                                                                                    | No       | Yes                                                 |          |
| Use of continuous hemodiafiltration, intra-aortic balloon pumping, percutaneous cardiopulmonary support, intracranial pressure, and/or extracorporeal membrane oxygenation | No       | Yes                                                 |          |
| B. Patient status                                                                                                                                                          |          |                                                     |          |
| Able to turn over while lying down                                                                                                                                         | Yes      | Yes, if the patient can grasp something for support | No       |
| Able to rise from a prone position                                                                                                                                         | Yes      | No                                                  |          |
| Able to maintain a sitting position                                                                                                                                        | Yes      | Yes, if the patient has some support                | No       |
| Able to transfer                                                                                                                                                           | Yes      | Requires watching/some assistance                   | No       |
| Able to maintain oral hygiene                                                                                                                                              | Yes      | No                                                  |          |
| Patients with ≥3 points from Section A and ≥3 points from Section B are considered to fulfill the evaluation criteria for medical and nursing care needs.                  |          |                                                     |          |
