# Supplementary material for: Associations of the staffing structure of intensive care units and high care units on in-hospital mortality among patients with sepsis: a cross-sectional study of Japanese nationwide claims data
Source: HighWire-hosted journal article supplement (doi:10.1136/bmjopen-2024-085763), 2024-07-01
Supplement: bmjopen-2024-085763supp004_data_supplement.pdf [file bmjopen-2024-085763supp004_data_supplement.pdf]

**Table S4.** Subgroup analysis results of the Cox proportional hazards analysis for in-hospital mortality

| Variables                                                                      | Hazard ratio | 95% CI    | P value |
|--------------------------------------------------------------------------------|--------------|-----------|---------|
| Sepsis due to blood, blood-forming organs, and immunological disorders (n=896) |              |           |         |
| Group (reference: Type 1 ICUs)                                                 |              |           |         |
| Type 2 ICUs                                                                    | 1.19         | 0.89-1.58 | 0.24    |
| HCUs                                                                           | 1.58         | 1.19-2.10 | <0.01   |

CI confidence interval, ARDS acute respiratory distress syndrome, HCU high care unit, ICU intensive care unit, MRSA methicillin-resistant *Staphylococcus aureus*
